# Supplementary material for: Chemoprevention of Colonic Aberrant Crypt Foci by Novel Schiff Based Dichlorido(4-Methoxy-2-{[2-(Piperazin-4-Ium-1-Yl)Ethyl]Iminomethyl}Phenolate)Cd Complex in Azoxymethane-Induced Colorectal Cancer in Rats
Source: PubMed Central journal article supplement (PMC4511874; doi:10.1038/srep12379), 2015-07-23
Supplement: srep12379-s1.pdf [file srep12379-s1.pdf]

**Chemoprevention of Colonic Aberrant Crypt Foci by Novel Schiff Based  
Dichlorido(4-Methoxy-2-[[2-(Piperazin-4-Ium-1-  
Yl)Ethyl]Iminomethyl}Phenolate)Cd Complex in Azoxymethane-Induced  
Colorectal Cancer in Rats**

Maryam Hajrezaie<sup>1,2</sup>, Keivan Shams<sup>1</sup>, Soheil Zorofchian Moghadamtousi<sup>2</sup>, Hamed Karimian<sup>1</sup>, Pouya Hassandarvish<sup>1</sup>, Mozghan Emtiazjoo<sup>3</sup>, Maryam Zahedifard<sup>1,2</sup>, Nazia Abdul Majid<sup>2</sup>, Hapipah Mohd Ali<sup>4</sup>, Mahmood Ameen Abdulla<sup>1\*</sup>

**Supplementary Table S1. Effects of 250 mg/kg of CdCl<sub>2</sub>(C<sub>14</sub>H<sub>21</sub>N<sub>3</sub>O<sub>2</sub>) complex on mice mortality.** There was no mortality observed in any group of mice.

| Occurrence of mortality                                                                                | 10 min | 30 min | 3 h | 24 h | 48 h |
|--------------------------------------------------------------------------------------------------------|--------|--------|-----|------|------|
| Vehicle Male                                                                                           | 0/6    | 0/6    | 0/6 | 0/6  | 0/6  |
| CdCl <sub>2</sub> (C <sub>14</sub> H <sub>21</sub> N <sub>3</sub> O <sub>2</sub> ) complex (250 mg/kg) | 0/6    | 0/6    | 0/6 | 0/6  | 0/6  |
| Vehicle Female                                                                                         | 0/6    | 0/6    | 0/6 | 0/6  | 0/6  |
| CdCl <sub>2</sub> (C <sub>14</sub> H <sub>21</sub> N <sub>3</sub> O <sub>2</sub> ) complex (250 mg/kg) | 0/6    | 0/6    | 0/6 | 0/6  | 0/6  |

**Supplementary Table S2. Effects of 250 mg/kg of CdCl<sub>2</sub>(C<sub>14</sub>H<sub>21</sub>N<sub>3</sub>O<sub>2</sub>) complex on mice body weight.** Values are expressed as the means ± S.E.M. There are no statistically significant differences between the measurements of different groups. Significance was set at  $P < 0.05$ .

| Dose of compound                                                                                       | Mice body weight (g) Day 0 | Mice body weight (g) Day15 |
|--------------------------------------------------------------------------------------------------------|----------------------------|----------------------------|
| Vehicle Male                                                                                           | 28.5 ± 2.66                | 32 ± 2.83                  |
| CdCl <sub>2</sub> (C <sub>14</sub> H <sub>21</sub> N <sub>3</sub> O <sub>2</sub> ) complex (250 mg/kg) | 30.5 ± 2.86                | 34 ± 3.01                  |
| Vehicle Female                                                                                         | 23 ± 2.37                  | 26 ± 2.70                  |
| CdCl <sub>2</sub> (C <sub>14</sub> H <sub>21</sub> N <sub>3</sub> O <sub>2</sub> ) complex (250 mg/kg) | 22.5 ± 2.60                | 26 ± 2.77                  |
